# Supplementary material for: Effects of neutral point defects on the solid-state electrolyte Li3ScBr6
Source: Royal Society of Chemistry journal article supplement (doi:10.1039/d3tc03266c), 2024-01-01

## Supporting Information

### Effects of neutral point defects on the solid-state electrolyte $\text{Li}_3\text{ScBr}_6$

Ming Jiang<sup>1</sup>, Zhi-Wen Chen<sup>2,\*</sup>, Adwitiya Rao<sup>2</sup>, Li-Xin Chen<sup>2</sup>, Parvin Adeli<sup>3</sup>, Patrick Mercier<sup>3</sup>, Yaser Abu-Lebdeh<sup>3</sup>, Chandra Veer Singh<sup>2,4,\*</sup>

<sup>1</sup>Institutes of Physical Science and Information Technology, Anhui University, Hefei 230601, China

<sup>2</sup>Department of Materials Science and Engineering, University of Toronto, Ontario M5S 3E4, Canada

<sup>3</sup>Energy, Mining, and Environment Research Centre, National Research Council of Canada, 1200 Montreal Road, Ottawa, Ontario K1A 0R6, Canada

<sup>4</sup>Department of Mechanical and Industrial Engineering, University of Toronto, Ontario M5S 3G8, Canada

**Table S1.** The lattice constant and band gap of  $\text{Li}_3\text{ScBr}_6$  at different  $U_{\text{eff}}$  values.

| $U_{\text{eff}}$ (eV) | Lattice constant ( $\text{\AA}$ ) |       |      | band gap (eV) |
|-----------------------|-----------------------------------|-------|------|---------------|
|                       | $a$                               | $b$   | $c$  |               |
| 0                     | 6.77                              | 11.73 | 6.69 | 2.97          |
| 1                     | 6.77                              | 11.74 | 6.69 | 3.11          |
| 2                     | 6.78                              | 11.75 | 6.71 | 3.26          |
| 3                     | 6.79                              | 11.76 | 6.72 | 3.66          |
| 4                     | 6.79                              | 11.76 | 6.72 | 3.69          |
| 5                     | 6.79                              | 11.77 | 6.72 | 3.72          |
| 6                     | 6.79                              | 11.76 | 6.75 | 3.77          |

**Table S2.** Defect formation energy of  $\text{Li}_3\text{ScBr}_6$  at different  $U_{\text{eff}}$  values.

|                          | $U_{\text{eff}}=0$ | $U_{\text{eff}}=1$ | $U_{\text{eff}}=2$ | $U_{\text{eff}}=3$ | $U_{\text{eff}}=4$ | $U_{\text{eff}}=5$ | $U_{\text{eff}}=6$ |
|--------------------------|--------------------|--------------------|--------------------|--------------------|--------------------|--------------------|--------------------|
| $V_{\text{Li}}$          | 2.50               | 2.51               | 2.50               | 2.50               | 2.48               | 2.48               | 2.47               |
| $V_{\text{Sc}}$          | 7.65               | 7.64               | 7.64               | 7.64               | 7.64               | 7.62               | 7.63               |
| $V_{\text{Br}}$          | 2.92               | 2.91               | 2.94               | 2.94               | 2.94               | 2.93               | 2.96               |
| $\text{Li}_{\text{int}}$ | 0.49               | 0.49               | 0.50               | 0.52               | 0.47               | 0.53               | 0.51               |
| $\text{Sc}_{\text{int}}$ | 2.83               | 2.79               | 2.78               | 2.78               | 2.78               | 2.78               | 2.76               |
| $\text{Br}_{\text{int}}$ | 1.19               | 1.18               | 1.18               | 1.19               | 1.16               | 1.17               | 1.17               |
| $\text{Li}_{\text{Sc}}$  | 4.40               | 4.37               | 4.41               | 4.42               | 4.39               | 4.41               | 4.41               |
| $\text{Li}_{\text{Br}}$  | 2.76               | 2.73               | 2.75               | 2.76               | 2.77               | 2.74               | 2.72               |
| $\text{Sc}_{\text{Li}}$  | 1.77               | 1.80               | 1.81               | 1.81               | 1.76               | 1.75               | 1.78               |
| $\text{Sc}_{\text{Br}}$  | 5.94               | 5.91               | 5.92               | 5.91               | 5.90               | 5.90               | 5.92               |
| $\text{Br}_{\text{Li}}$  | 3.26               | 3.28               | 3.29               | 3.26               | 3.25               | 3.26               | 3.24               |
| $\text{Br}_{\text{Sc}}$  | 7.34               | 7.34               | 7.36               | 7.39               | 7.37               | 7.39               | 7.36               |

**Table S3.** Li<sup>+</sup> ionic conductivity ( $\sigma$ ) and activation energy ( $E_a$ ) of pristine Li<sub>3</sub>ScBr<sub>6</sub> at different  $U_{eff}$  values.

|             | $\sigma$ (mS/cm) | $E_a$ (eV) |
|-------------|------------------|------------|
| $U_{eff}=0$ | 1.36             | 0.221      |
| $U_{eff}=1$ | 1.34             | 0.219      |
| $U_{eff}=2$ | 1.37             | 0.218      |
| $U_{eff}=3$ | 1.39             | 0.216      |
| $U_{eff}=4$ | 1.38             | 0.216      |
| $U_{eff}=5$ | 1.42             | 0.215      |
| $U_{eff}=6$ | 1.38             | 0.217      |

**Table S4.** Formation energy (eV) of point defects in  $\text{Li}_3\text{ScBr}_6$  at different defect concentrations.  $V_X$ : X vacancy;  $X_{\text{int}}$ : X interstitial;  $X_Y$ : X occupying the Y lattice site (X, Y = Li, Sc or Br)

|                          | 0.625% | 1.25% | 1.875% | 2.50% | 3.125% |
|--------------------------|--------|-------|--------|-------|--------|
| $V_{\text{Li}}$          | 2.42   | 2.50  | 2.61   | 2.69  | 2.73   |
| $V_{\text{Sc}}$          | 7.58   | 7.64  | 7.61   | 7.68  | 7.71   |
| $V_{\text{Br}}$          | 2.86   | 2.94  | 2.98   | 2.95  | 3.01   |
| $\text{Li}_{\text{int}}$ | 0.55   | 0.52  | 0.6    | 0.64  | 0.65   |
| $\text{Sc}_{\text{int}}$ | 2.67   | 2.78  | 2.88   | 2.94  | 2.92   |
| $\text{Br}_{\text{int}}$ | 1.23   | 1.19  | 1.22   | 1.26  | 1.28   |
| $\text{Li}_{\text{Sc}}$  | 4.36   | 4.42  | 4.44   | 4.30  | 4.38   |
| $\text{Li}_{\text{Br}}$  | 2.66   | 2.76  | 2.72   | 2.87  | 2.83   |
| $\text{Sc}_{\text{Li}}$  | 1.72   | 1.81  | 1.83   | 1.89  | 1.95   |
| $\text{Sc}_{\text{Br}}$  | 5.82   | 5.91  | 5.96   | 6.03  | 6.10   |
| $\text{Br}_{\text{Li}}$  | 3.17   | 3.26  | 3.3    | 3.38  | 3.45   |
| $\text{Br}_{\text{Sc}}$  | 7.20   | 7.39  | 7.41   | 7.35  | 7.48   |

**Table S5.** Bulk modulus (GPa) of defective  $\text{Li}_3\text{ScBr}_6$  at different defect concentrations.  $V_X$ : X vacancy;  $X_{\text{int}}$ : X interstitial;  $X_Y$ : X occupying the Y lattice site (X, Y = Li, Sc or Br).

|                          | 0.625% | 1.25% | 1.875% | 2.50% | 3.125% |
|--------------------------|--------|-------|--------|-------|--------|
| $V_{\text{Li}}$          | 14.32  | 13.66 | 13.25  | 12.41 | 12.01  |
| $V_{\text{Sc}}$          | 7.57   | 6.70  | 6.02   | 5.42  | 4.06   |
| $V_{\text{Br}}$          | 14.12  | 13.78 | 12.09  | 11.48 | 10.95  |
| $\text{Li}_{\text{int}}$ | 14.71  | 13.26 | 12.88  | 11.91 | 10.43  |
| $\text{Br}_{\text{int}}$ | 16.25  | 15.53 | 13.37  | 12.5  | 11.45  |
| $\text{Li}_{\text{Sc}}$  | 11.95  | 10.69 | 9.35   | 8.44  | 8.30   |
| $\text{Sc}_{\text{Br}}$  | 14.69  | 12.23 | 11.41  | 10.40 | 9.35   |
| $\text{Br}_{\text{Li}}$  | 9.77   | 6.88  | 6.15   | 5.58  | 4.19   |
| $\text{Br}_{\text{Sc}}$  | 11.61  | 10.91 | 9.84   | 8.11  | 7.55   |

**Table S6.** Shear modulus (GPa) of defective  $\text{Li}_3\text{ScBr}_6$  at different defect concentrations.  $V_X$ : X vacancy;  $X_{\text{int}}$ : X interstitial;  $X_Y$ : X occupying the Y lattice site (X, Y = Li, Sc or Br).

|                          | 0.625% | 1.25% | 1.875% | 2.50% | 3.125% |
|--------------------------|--------|-------|--------|-------|--------|
| $V_{\text{Li}}$          | 9.86   | 7.27  | 6.69   | 5.02  | 4.15   |
| $V_{\text{Sc}}$          | 10.9   | 8.72  | 7.09   | 6.51  | 5.17   |
| $V_{\text{Br}}$          | 9.26   | 7.40  | 6.33   | 5.71  | 4.24   |
| $\text{Li}_{\text{int}}$ | 11.01  | 10.66 | 9.04   | 8.89  | 7.23   |
| $\text{Br}_{\text{int}}$ | 8.08   | 6.14  | 5.06   | 4.68  | 3.57   |
| $\text{Li}_{\text{Sc}}$  | 10.12  | 9.29  | 8.18   | 7.41  | 6.79   |
| $\text{Sc}_{\text{Br}}$  | 9.85   | 8.88  | 7.84   | 7.29  | 6.61   |
| $\text{Br}_{\text{Li}}$  | 9.32   | 8.29  | 7.34   | 6.89  | 5.63   |
| $\text{Br}_{\text{Sc}}$  | 9.21   | 8.68  | 7.81   | 6.27  | 5.34   |

**Table S7.** Young's modulus (GPa) of defective  $\text{Li}_3\text{ScBr}_6$  at different defect concentrations.  $V_X$ : X vacancy;  $X_{\text{int}}$ : X interstitial;  $X_Y$ : X occupying the Y lattice site (X, Y = Li, Sc or Br).

|                          | 0.625% | 1.25% | 1.875% | 2.50% | 3.125% |
|--------------------------|--------|-------|--------|-------|--------|
| $V_{\text{Li}}$          | 21.87  | 18.53 | 17.68  | 16.06 | 15.55  |
| $V_{\text{Sc}}$          | 21.49  | 18.24 | 16.23  | 15.01 | 14.3   |
| $V_{\text{Br}}$          | 20.18  | 18.82 | 18.32  | 17.47 | 15.16  |
| $\text{Li}_{\text{int}}$ | 20.35  | 17.73 | 16.61  | 15.22 | 14.38  |
| $\text{Br}_{\text{int}}$ | 19.91  | 16.27 | 15.59  | 14.16 | 13.02  |
| $\text{Li}_{\text{Sc}}$  | 20.59  | 21.62 | 19.12  | 18.53 | 16.93  |
| $\text{Sc}_{\text{Br}}$  | 22.75  | 21.41 | 20.9   | 19.71 | 18.79  |
| $\text{Br}_{\text{Li}}$  | 19.76  | 17.74 | 15.75  | 14.89 | 13.15  |
| $\text{Br}_{\text{Sc}}$  | 21.44  | 20.57 | 19.13  | 17.80 | 16.73  |



**Table S8.** Phase equilibria and minimum decomposition energies ( $\Delta E_D$ : meV/atom) of ideal and defective  $\text{Li}_3\text{ScBr}_6$  at the interface with  $\text{LiCoO}_2$  cathode material.  $V_X$ : X vacancy;  $X_{\text{int}}$ : X interstitial;  $X_Y$ : X occupying the Y lattice site (X, Y = Li, Sc or Br).

| $C_{\text{SSE}}$         | $C_{\text{electrode}}$        | $x_m$ | Phase equilibria at $x_m$              | $\Delta E_D$ |
|--------------------------|-------------------------------|-------|----------------------------------------|--------------|
| Pristine                 | $\text{LiCoO}_2$              | 0.38  | CoO, LiBr, Br, $\text{Sc}_2\text{O}_3$ | -93.16       |
|                          | $\text{Li}_{0.5}\text{CoO}_2$ | 0.34  | CoO, LiBr, Br, $\text{Sc}_2\text{O}_3$ | -100.53      |
| $V_{\text{Li}}$          | $\text{LiCoO}_2$              | 0.38  | CoO, LiBr, Br, $\text{Sc}_2\text{O}_3$ | -93.89       |
|                          | $\text{Li}_{0.5}\text{CoO}_2$ | 0.35  | CoO, LiBr, Br, $\text{Sc}_2\text{O}_3$ | -101.36      |
| $V_{\text{Sc}}$          | $\text{LiCoO}_2$              | 0.35  | CoO, LiBr, Br, $\text{Sc}_2\text{O}_3$ | -86.23       |
|                          | $\text{Li}_{0.5}\text{CoO}_2$ | 0.32  | CoO, LiBr, Br, $\text{Sc}_2\text{O}_3$ | -92.71       |
| $V_{\text{Br}}$          | $\text{LiCoO}_2$              | 0.38  | CoO, LiBr, Br, $\text{Sc}_2\text{O}_3$ | -111.41      |
|                          | $\text{Li}_{0.5}\text{CoO}_2$ | 0.35  | CoO, LiBr, Br, $\text{Sc}_2\text{O}_3$ | -119.75      |
| $\text{Li}_{\text{int}}$ | $\text{LiCoO}_2$              | 0.37  | CoO, LiBr, Br, $\text{Sc}_2\text{O}_3$ | -109.68      |
|                          | $\text{Li}_{0.5}\text{CoO}_2$ | 0.34  | CoO, LiBr, Br, $\text{Sc}_2\text{O}_3$ | -117.80      |
| $\text{Br}_{\text{int}}$ | $\text{LiCoO}_2$              | 0.37  | CoO, LiBr, Br, $\text{Sc}_2\text{O}_3$ | -92.44       |
|                          | $\text{Li}_{0.5}\text{CoO}_2$ | 0.34  | CoO, LiBr, Br, $\text{Sc}_2\text{O}_3$ | -99.71       |
| $\text{Li}_{\text{Sc}}$  | $\text{LiCoO}_2$              | 0.34  | CoO, LiBr, Br, $\text{Sc}_2\text{O}_3$ | -85.52       |
|                          | $\text{Li}_{0.5}\text{CoO}_2$ | 0.31  | CoO, LiBr, Br, $\text{Sc}_2\text{O}_3$ | -91.92       |
| $\text{Sc}_{\text{Br}}$  | $\text{LiCoO}_2$              | 0.18  | CoO, LiBr, Br, $\text{Sc}_2\text{O}_3$ | -170.74      |
|                          | $\text{Li}_{0.5}\text{CoO}_2$ | 0.37  | CoO, LiBr, Br, $\text{Sc}_2\text{O}_3$ | -179.49      |
| $\text{Br}_{\text{Li}}$  | $\text{LiCoO}_2$              | 0.38  | CoO, LiBr, Br, $\text{Sc}_2\text{O}_3$ | -90.76       |
|                          | $\text{Li}_{0.5}\text{CoO}_2$ | 0.34  | CoO, LiBr, Br, $\text{Sc}_2\text{O}_3$ | -97.35       |
| $\text{Br}_{\text{Sc}}$  | $\text{LiCoO}_2$              | 0.34  | CoO, LiBr, Br, $\text{Sc}_2\text{O}_3$ | -88.37       |
|                          | $\text{Li}_{0.5}\text{CoO}_2$ | 0.31  | CoO, LiBr, Br, $\text{Sc}_2\text{O}_3$ | -96.25       |

**Table S9.** Phase equilibria and minimum decomposition energies ( $\Delta E_D$ : meV/atom) of ideal and defective  $\text{Li}_3\text{ScBr}_6$  at the interface with  $\text{LiFePO}_4$  cathode material.  $V_X$ : X vacancy;  $X_{\text{int}}$ : X interstitial;  $X_Y$ : X occupying the Y lattice site (X, Y = Li, Sc or Br).

| $C_{\text{SSE}}$         | $C_{\text{electrode}}$ | $x_m$ | Phase equilibria at $x_m$                                                         | $\Delta E_D$ |
|--------------------------|------------------------|-------|-----------------------------------------------------------------------------------|--------------|
| Pristine                 | $\text{LiFePO}_4$      | 0.68  | LiBr, $\text{ScPO}_4$ , $\text{Fe}_3(\text{PO}_4)_2$                              | -12.73       |
|                          | $\text{FePO}_4$        | 0.38  | LiBr, $\text{LiFeBr}_4$ , $\text{ScPO}_4$                                         | -58.19       |
| $V_{\text{Li}}$          | $\text{LiFePO}_4$      | 0.66  | $\text{LiFeBr}_4$ , $\text{ScPO}_4$ , $\text{Fe}_3(\text{PO}_4)_2$ , LiBr         | -14.92       |
|                          | $\text{FePO}_4$        | 0.38  | Br, $\text{ScPO}_4$ , LiBr, $\text{LiFeBr}_4$                                     | -58.65       |
| $V_{\text{Sc}}$          | $\text{LiFePO}_4$      | 0.21  | $\text{ScPO}_4$ , $\text{ScBr}_3$ , $\text{LiFeBr}_4$ , LiBr                      | -21.43       |
|                          | $\text{FePO}_4$        | 0.44  | Br, $\text{Li}_3\text{Sc}_2(\text{PO}_4)_3$ , LiBr, $\text{LiFeBr}_4$             | -54.45       |
| $V_{\text{Br}}$          | $\text{LiFePO}_4$      | 0.02  | $\text{Fe}_2\text{P}$ , $\text{ScBrO}$ , $\text{ScPO}_4$ , $\text{ScBr}_3$ , LiBr | -20.64       |
|                          | $\text{FePO}_4$        | 0.41  | $\text{LiFeBr}_4$ , LiBr, $\text{LiFePO}_4$ , $\text{ScPO}_4$                     | -74.36       |
| $\text{Li}_{\text{int}}$ | $\text{LiFePO}_4$      | 0.02  | LiBr, $\text{ScPO}_4$ , $\text{Fe}_2\text{P}$ , $\text{ScBr}_3$ , $\text{ScBrO}$  | -20.14       |
|                          | $\text{FePO}_4$        | 0.40  | $\text{ScPO}_4$ , LiBr, $\text{LiFePO}_4$ , $\text{LiFeBr}_4$                     | -73.25       |
| $\text{Br}_{\text{int}}$ | $\text{LiFePO}_4$      | 0.66  | LiBr, $\text{ScPO}_4$ , $\text{Fe}_3(\text{PO}_4)_2$ , $\text{LiFeBr}_4$          | -14.79       |
|                          | $\text{FePO}_4$        | 0.47  | $\text{Li}_3\text{Sc}_2(\text{PO}_4)_3$ , $\text{ScPO}_4$ , Br, $\text{LiFeBr}_4$ | -57.75       |
| $\text{Li}_{\text{Sc}}$  | $\text{LiFePO}_4$      | 0.60  | $\text{ScPO}_4$ , $\text{LiFeBr}_4$ , $\text{Fe}_3(\text{PO}_4)_2$ , LiBr         | -17.09       |
|                          | $\text{FePO}_4$        | 0.44  | Br, LiBr, $\text{LiFeBr}_4$ , $\text{Li}_3\text{Sc}_2(\text{PO}_4)_3$             | -54.07       |
| $\text{Sc}_{\text{Br}}$  | $\text{LiFePO}_4$      | 0.05  | LiBr, $\text{Fe}_2\text{P}$ , $\text{ScBrO}$ , $\text{ScBr}_3$ , $\text{FeP}$     | -78.60       |
|                          | $\text{FePO}_4$        | 0.47  | LiBr, $\text{Fe}_3(\text{PO}_4)_2$ , $\text{ScPO}_4$ , $\text{LiFeBr}_4$          | -116.19      |
| $\text{Br}_{\text{Li}}$  | $\text{LiFePO}_4$      | 0.64  | $\text{Fe}_3(\text{PO}_4)_2$ , $\text{LiFeBr}_4$ , LiBr, $\text{ScPO}_4$          | -17.25       |
|                          | $\text{FePO}_4$        | 0.38  | $\text{ScPO}_4$ , Br, LiBr, $\text{LiFeBr}_4$                                     | -58.19       |
| $\text{Br}_{\text{Sc}}$  | $\text{LiFePO}_4$      | 0.26  | $\text{ScPO}_4$ , $\text{LiFeBr}_4$ , $\text{ScBr}_3$ , LiBr                      | -26.45       |
|                          | $\text{FePO}_4$        | 0.44  | LiBr, Br, $\text{Li}_3\text{Sc}_2(\text{PO}_4)_3$ , $\text{LiFeBr}_4$             | -54.07       |

**Figure S1.** Mean square displacement (MSD) of  $\text{Li}^+$  ions in defective  $\text{Li}_3\text{ScBr}_6$ .  $V_X$ : X vacancy;  $X_{\text{int}}$ : X interstitial;  $X_Y$ : X occupying the Y lattice site (X, Y = Li, Sc or Br).

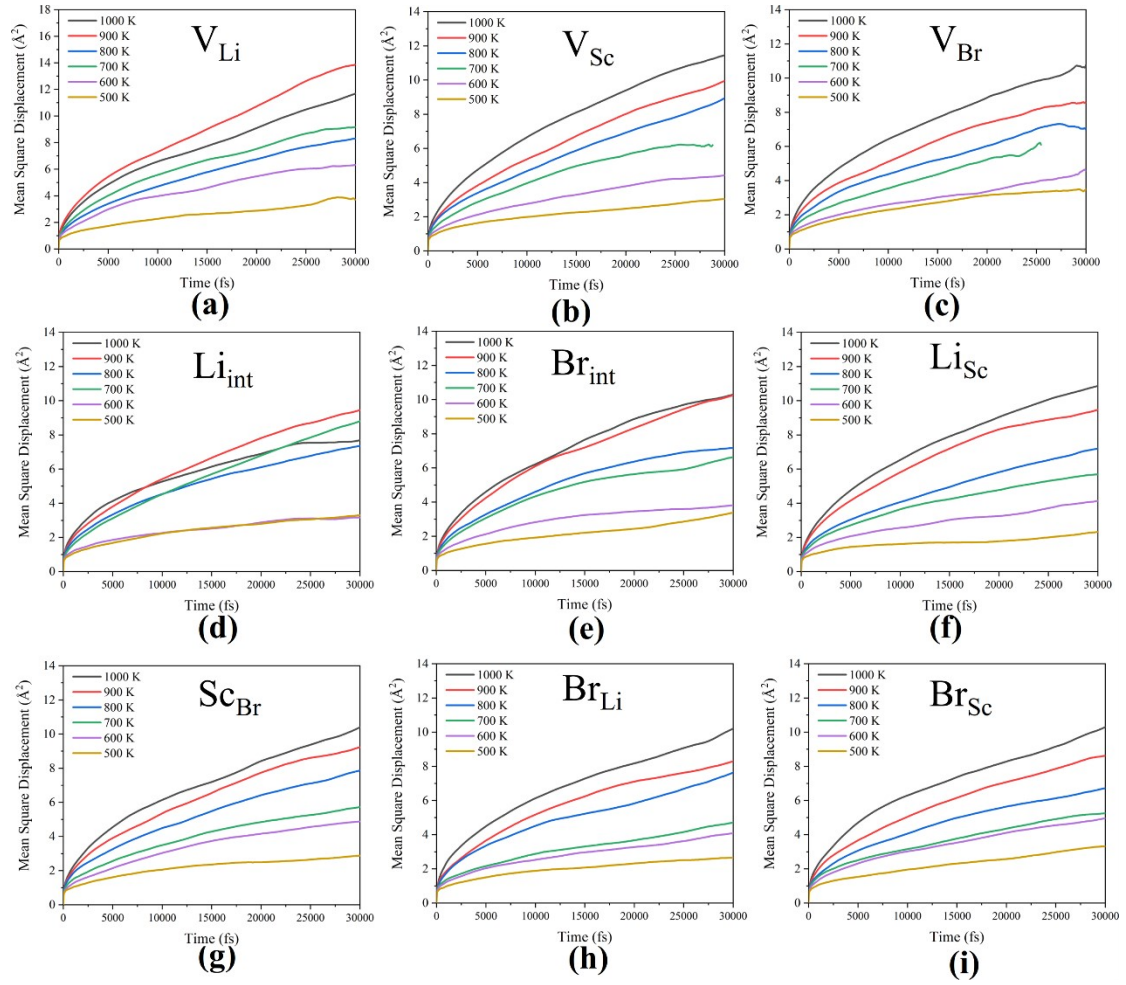

**Figure S2.** Arrhenius plot of the diffusion coefficient of defective  $\text{Li}_3\text{ScBr}_6$ .  $V_X$ : X vacancy;  $X_{\text{int}}$ : X interstitial;  $X_Y$ : X occupying the Y lattice site (X, Y = Li, Sc or Br).

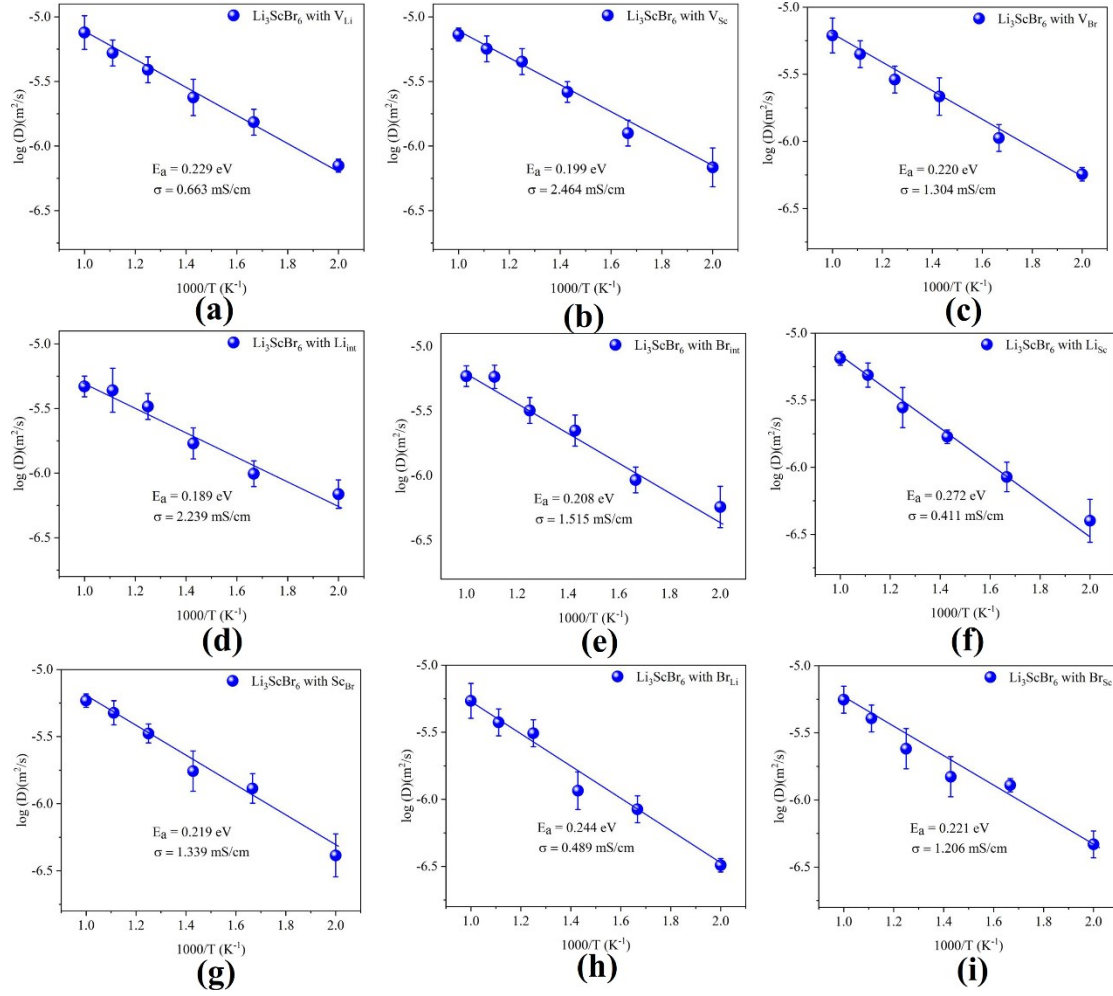

**Figure S3.** Diffusion path of  $\text{Li}^+$  ions in defective  $\text{Li}_3\text{ScBr}_6$ . The yellow surface corresponds to the ionic conduction path, and the regions enclosed with blue surfaces correspond to the stable lithium-ion positions.  $V_X$ : X vacancy;  $X_{\text{int}}$ : X interstitial;  $X_Y$ : X occupying the Y lattice site (X, Y = Li, Sc or Br).

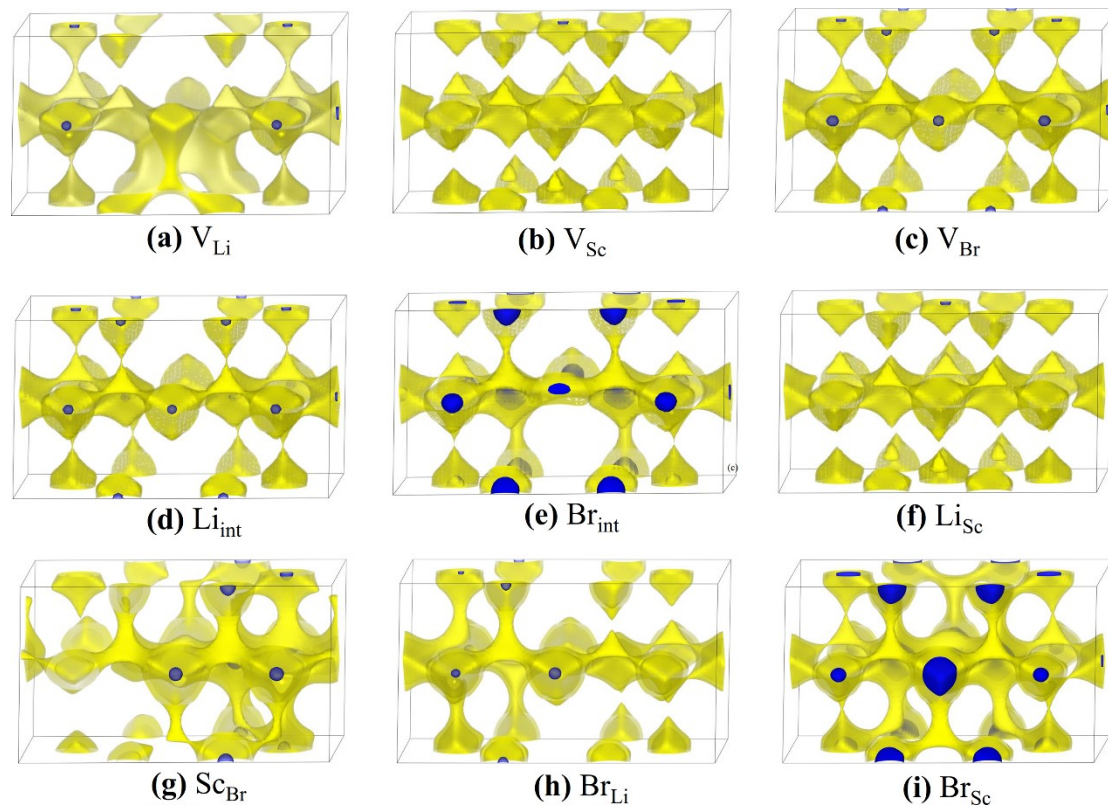

Supplement: d3tc03266c1.pdf [file d3tc03266c1.pdf]
